# Supplementary material for: Protection against SARS-CoV-2 infection by a mucosal vaccine in rhesus macaques
Source: PubMed Central journal article supplement (PMC8262352; doi:10.1172/jci.insight.148494), 2021-04-28
Supplement: jciinsight-6-148494-s132.pdf [file jciinsight-6-148494-s132.pdf]

## Supplementary data

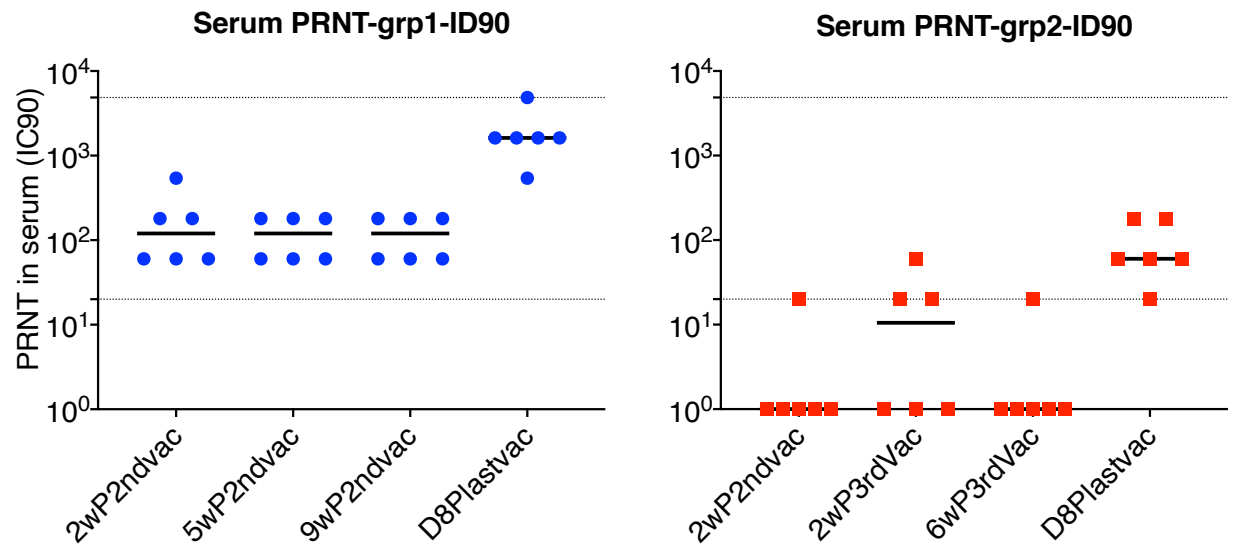

**Supplementary Figure 1. The kinetics of PRNT neutralizing titers (ID90) in the vaccinated groups.** Short lines and dashed lines show medians, the lower and upper assay limits respectively.

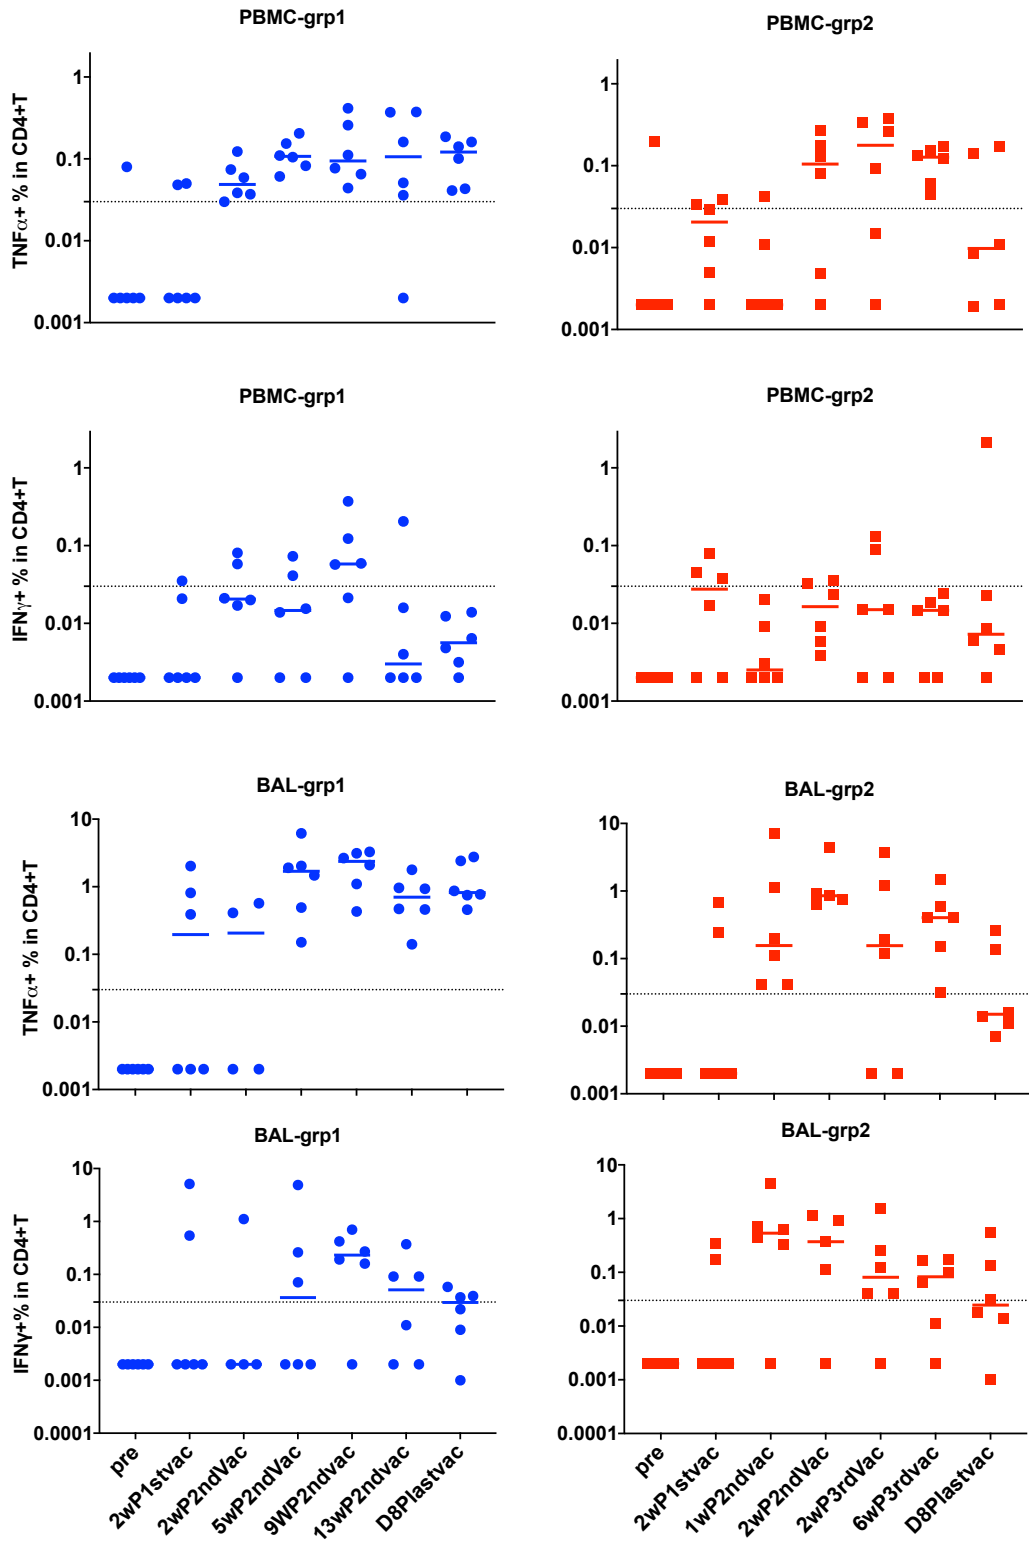

**Supplementary Figure 2. Spike-specific TNF $\alpha$ + or IFN $\gamma$ + CD4+ T cell responses in PBMC and BAL samples of the vaccinated animals. Short lines show medians.**

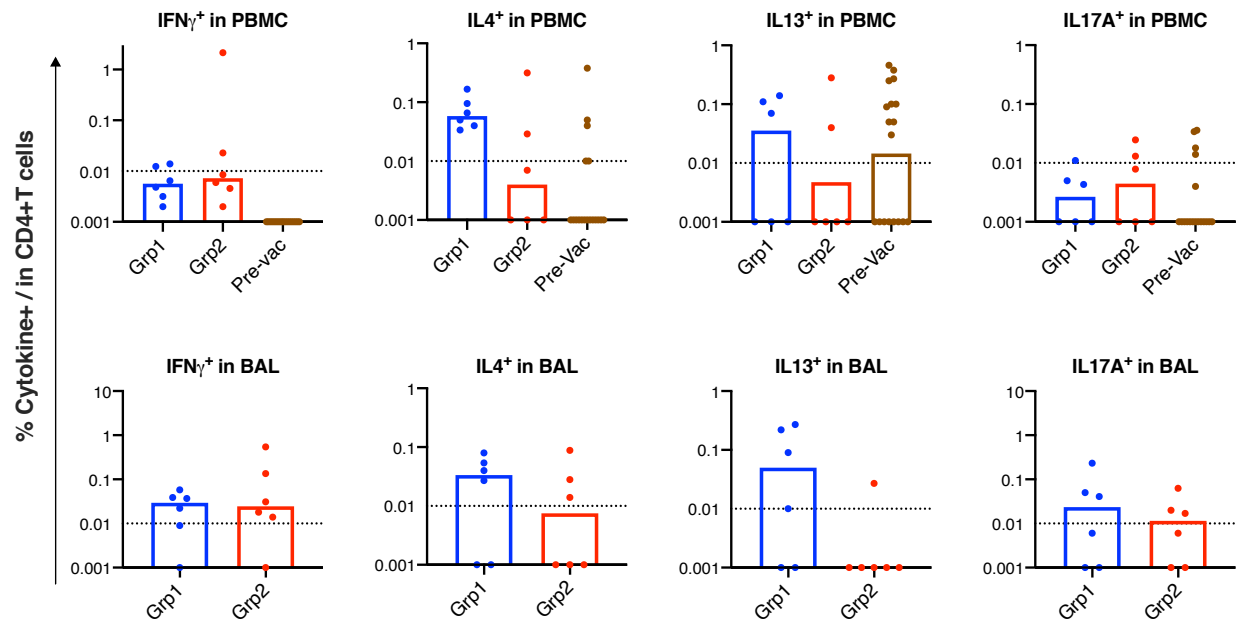

**Supplementary Figure 3. Spike-specific Th subsets in PBMC and BAL samples of the vaccinated animals at Day8 post last vaccination. The dashed lines show the assay limit (bars are the medians). Medians are shown. Dashed lines are the threshold for positive responses.**

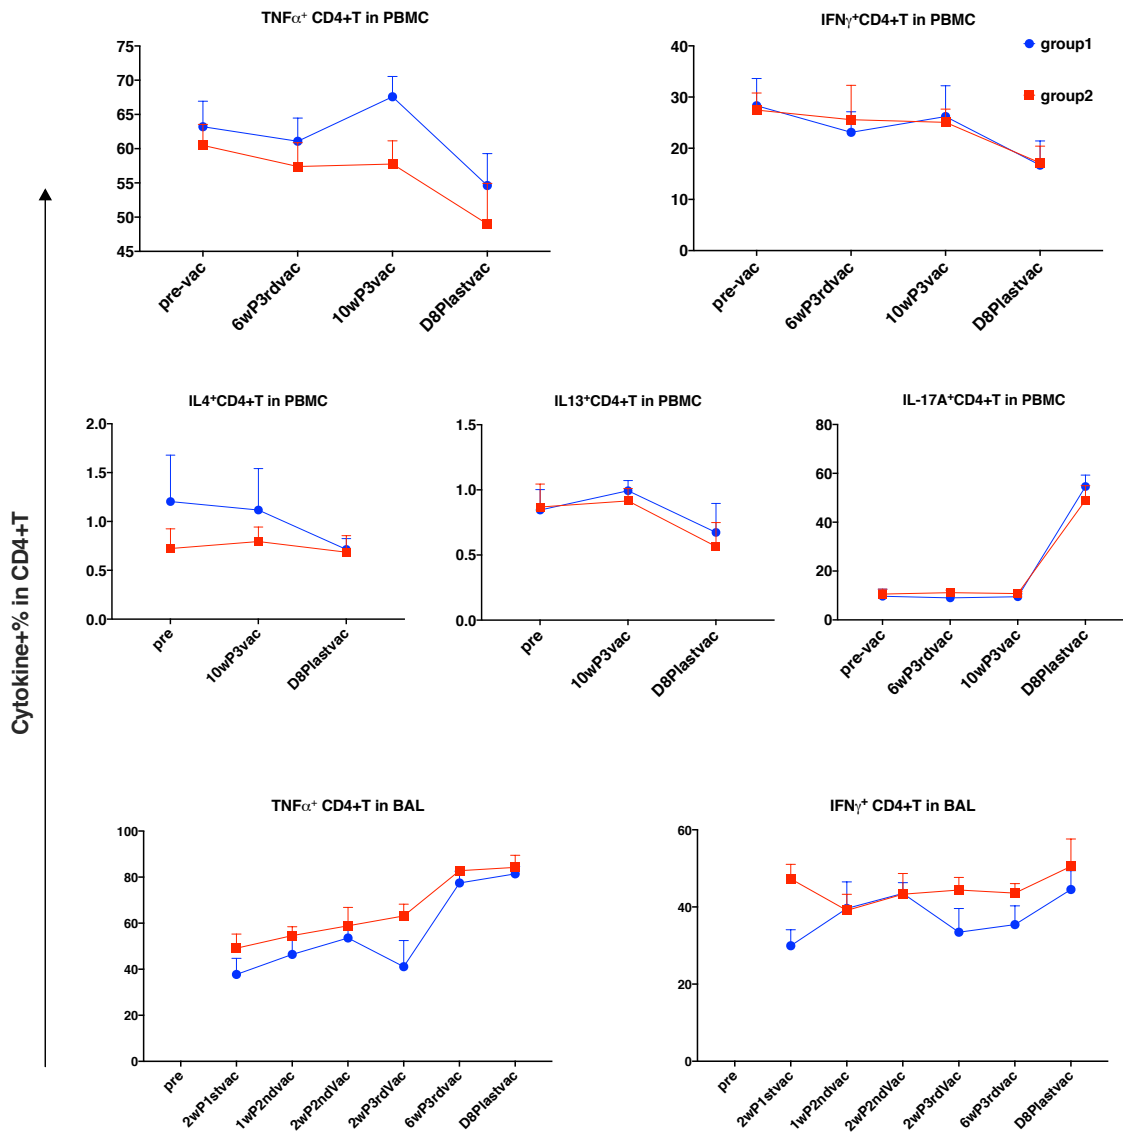

**Supplementary Figure 4. The kinetics of PMA-stimulated Th1, Th2 and Th17 subsets in PBMCs and Th1 subsets in BALs of the vaccinated animals. Means with SEMs are shown.**

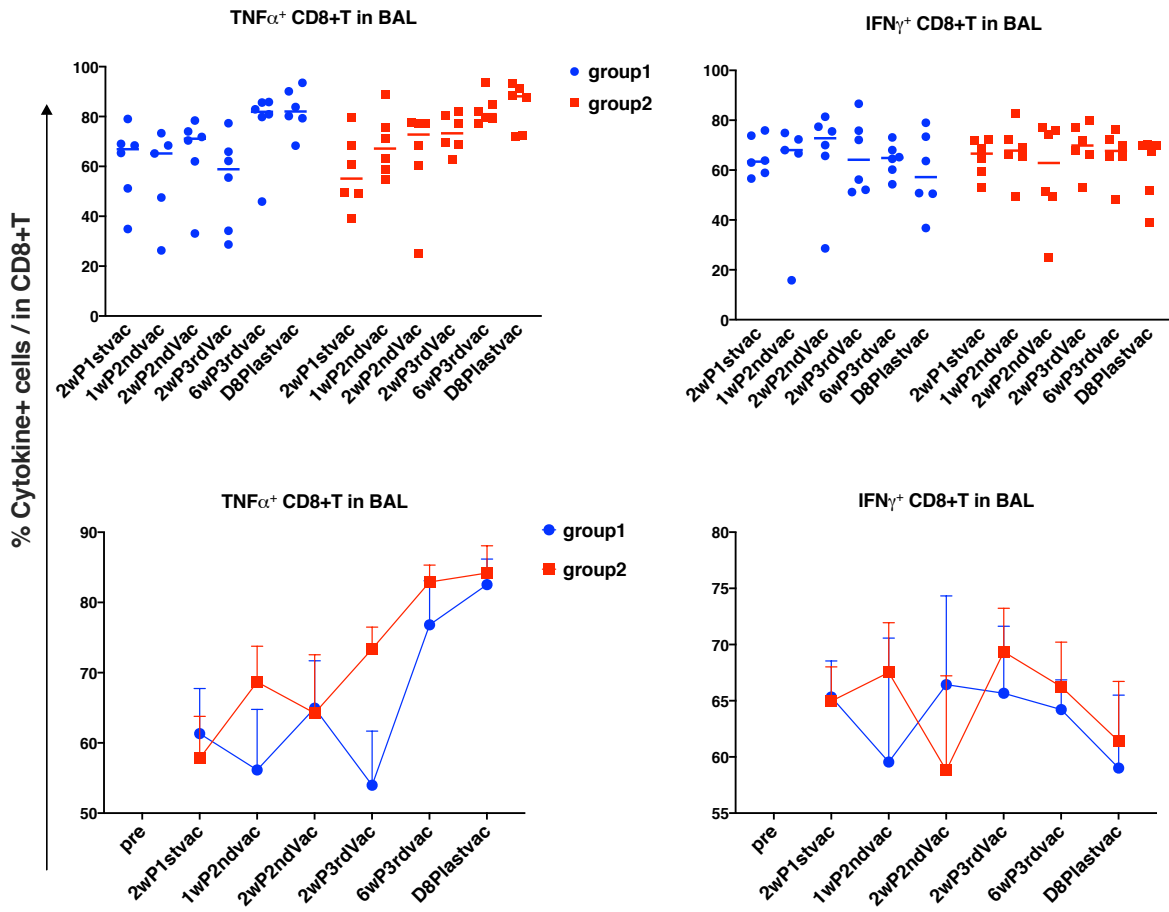

**Supplementary Figure 5. The Tc1 immune responses stimulated by PMA in the BAL samples of the vaccinated animals.** Medians are shown in the upper panels, means with SEMs are shown in the lower panels.

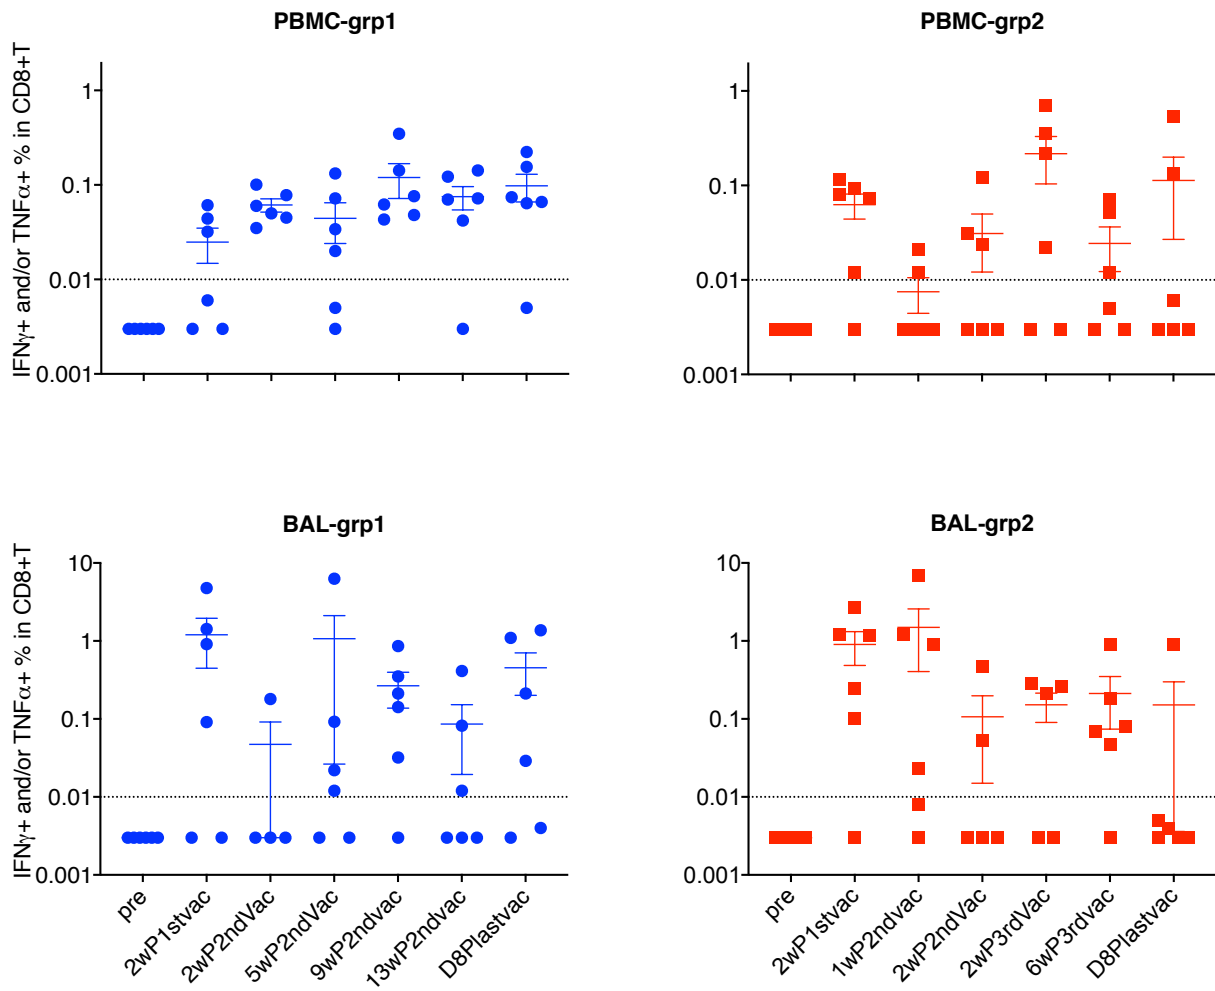

**Supplementary Figure 6. Spike-specific TNF $\alpha$ <sup>+</sup> and/or IFN $\gamma$ <sup>+</sup> CD8<sup>+</sup> T cell responses in PBMC and BAL samples of the vaccinated animals. Medians are shown in the upper panels, means with SEMs are shown in the lower panels.**

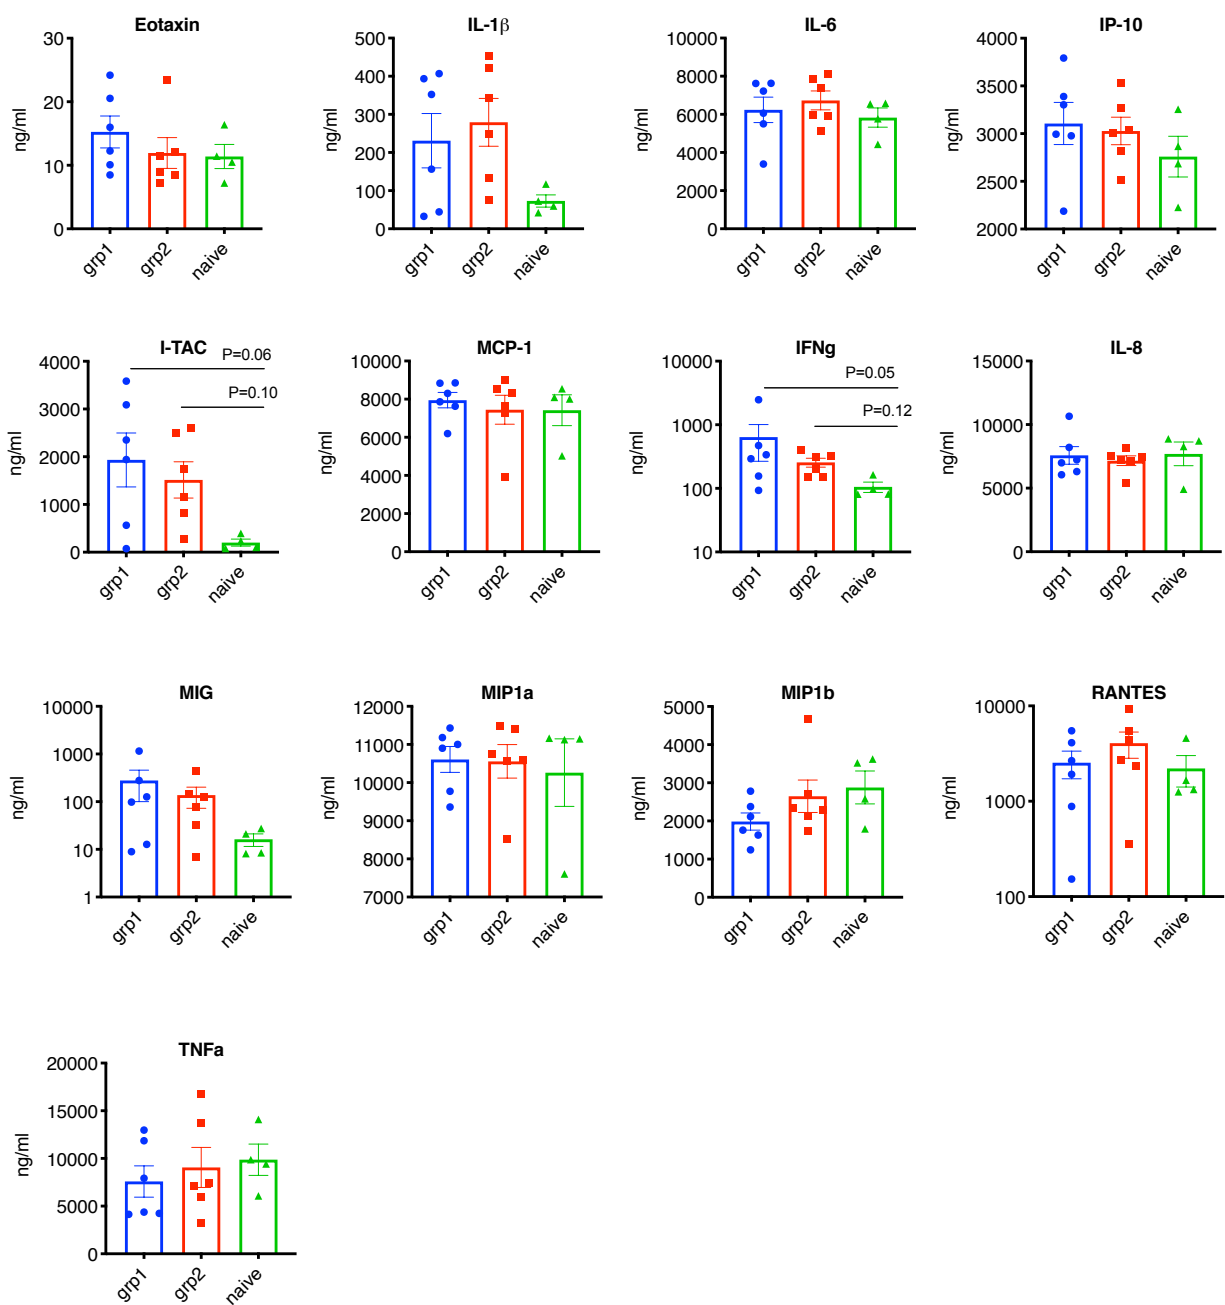

**Supplementary Figure 7. Chemokines and cytokines production upon stimulation with polyI:C+S1 in the BAL samples from the vaccinated animals.** BAL samples from 1-week post 2<sup>nd</sup> vaccination were treated with polyI:C+S1 protein for 18 hrs. before supernatant was collected for measurement of a total of 13 chemokines and cytokines. Means with SEMs are shown

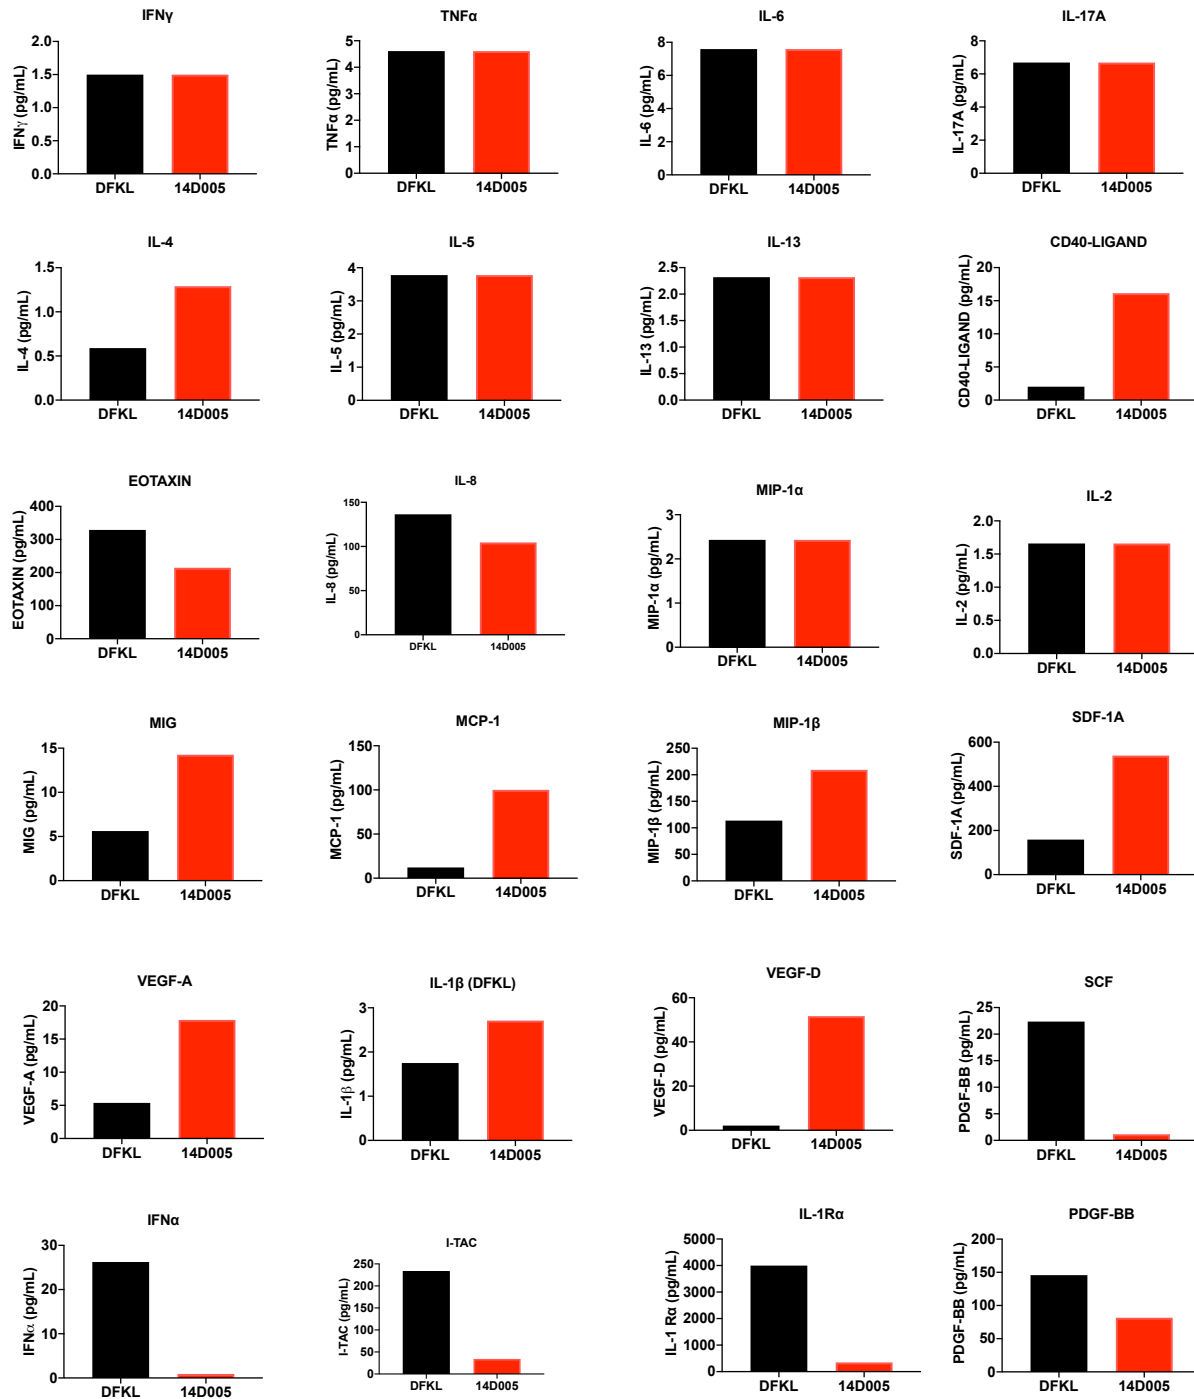

**Supplementary Figure 8. Chemokines and cytokines production in the serum of two naïve control animal's two days after SARS-CoV-2 challenge. DFKL is a naïve control animal that never showed any viral load, while 14D005 showed viral load.**



**Supplementary Table1. Pathological summary of the animals challenged with SARS-Cov-2 virus**

|        | Animal# | Age (years) | Necropsy Days post challenge | Lung H&E (Lc, Rmid, Rc)* | COVID IHC (Lc, Rmid, Rc)** | Comments#                                                                                                              |
|--------|---------|-------------|------------------------------|--------------------------|----------------------------|------------------------------------------------------------------------------------------------------------------------|
| Group1 | DG9V    | 4           | Day7                         | -;-;-                    | -;-;-                      |                                                                                                                        |
|        | DGTK    | 4           | Day7                         | -;+/-                    | -;-;-                      | Very mild, focal Alv hypercellularity                                                                                  |
|        | DG9P    | 4           | Day 7                        | -;-;-                    | -;-;-                      |                                                                                                                        |
|        | DGA5    | 4           | Day 10                       | -;-;-                    | -;-;-                      |                                                                                                                        |
|        | DG8X    | 4           | Day 10                       | -;+/-;-                  | -;-;-                      |                                                                                                                        |
|        | DGLV    | 5           | Day 10                       | -;+/-+/-                 | -;-;-                      |                                                                                                                        |
| Group2 | DGWN    | 4           | Day7                         | -;-;-                    | -;-;-                      |                                                                                                                        |
|        | DG1V    | 4           | Day7                         | -;-+/-                   | -;-;-                      |                                                                                                                        |
|        | DG0Z    | 4           | Day 7                        | -;-;-                    | -;-;-                      |                                                                                                                        |
|        | DGD1    | 5           | Day 10                       | -;-;-                    | -;-;-                      |                                                                                                                        |
|        | DGXT    | 4           | Day 10                       | +;+/-;+++                | -;-;-                      | intraAlv; Type II hyper                                                                                                |
|        | DGZC    | 4           | Day 10                       | -;+/-;-                  | -;-;-                      | Small, mild, focal area of Type II hyper; otherwise minimal change                                                     |
| Naive  | 14D005  | 6           | Day 7                        | +/-;-+/-;+               | -;-+/-                     | Alv; intra Alv; Type II hyper; mild PV                                                                                 |
|        | 14D006  | 6           | Day 7                        | +;+++;+                  | -;+/-+/-                   | Changes Alv/ br; appeared more chronic with Type II hyper                                                              |
|        | 14D035  | 6           | Day 7                        | +/-;-+;                  | -;-;-                      | Mild, focal Alv hypercellularity; mild PV inflammation                                                                 |
|        | 14D043  | 6           | Day 10                       | +++;+++;+++              | -;-;-                      | Changes Alv/br; intraAlv; appeared more chronic with very prominent Type II hyper                                      |
|        | 14D041  | 6           | Day 10                       | +/-;-;-                  | -;-;-                      | Changes were mild, focal, Alv hypercellularity                                                                         |
|        | DFKL    | 8           | Day 10                       | +/-;+/-;+                | -;-;-                      | Mild focal Alv hypercellularity; focal intraAlv infiltrates and mild, focal PV; mild, focal, (prominent) Type II hyper |

\*Inflammation score: <10% (tissue affected) = +/-; >10-<25% = +; >26-<50% = ++; >50%= +++

\*\*COVID-19 viral Antigen (Ag) scoring: Minimal - absent = -; Minimally abundant (but clearly present)/ rare = +/-; Mildly abundant/ occasional = +; Moderately abundant =++; Abundant = +++

# alveolar interstitium (Alv); intra-alveolar infiltrates (intraAlv); Bronchi (Br) or Bronchioles (br); Perivascular spaces (PV) or Type II pneumocyte hyperplasia (Type II). Left caudal (Lc); Right Middle (Rmid), and Right caudal (Rc) lobes.

**Supplementary Table 2. Monoclonal antibodies used in this study.**

| Antibody     | conjugated            | clone        | company          |
|--------------|-----------------------|--------------|------------------|
| CD3          | PE-cy7                | SP34-2       | BD               |
| CD4          | BV605                 | L200         | BD               |
| CD8          | APC-cy7               | RPA-T8       | BD               |
| CD28         | FITC                  | CD28.2       | Biolegend        |
| CD95         | PE-cy5                | DX2          | Biolegend        |
| TNF $\alpha$ | Brilliant Violet 711™ | MAb11        | Biolegend        |
| IFN $\gamma$ | PE or PerCP           | 4S.B3        | Biolegend        |
| IL-4         | Alexa Fluor® 647      | 8D4-8        | Biolegend        |
| IL-13        | PE                    | JES 10-5A2.2 | Miltenyi Biotech |
| IL-2         | Brilliant Violet 785™ | MQ1-17H12    | Biolegend        |
| IL-17A       | Brilliant Violet 421™ | BL168        | Biolegend        |
| CD14         | Brilliant Violet 785™ | M5E2         | Biolegend        |
| CD16         | Brilliant Violet 421™ | 3G8          | Biolegend        |
| CD45         | Alexa Fluor® 700      | D058-1283    | BD               |
